# Supplementary material for: RNA structures within Venezuelan equine encephalitis virus E1 alter macrophage replication fitness and contribute to viral emergence
Source: PubMed Central journal article supplement (PMC11030350; doi:10.1101/2024.04.09.588743), 2024-04-09
Supplement: NIHPP2024.04.09.588743v1-supplement-1.pdf [file NIHPP2024.04.09.588743v1-supplement-1.pdf]

710

711 **Table S1:** Primer sequences for generation of RIG-I and MDA5 CRISPR cell lines

| Gene  | Primer      | Sequence                         |
|-------|-------------|----------------------------------|
| Ddx58 | Ddx58.g19.F | 5'- CACCGAAGAACAACAAGGGCCCAA-3'  |
|       | Ddx58.g19.R | 5'- AAACCTTGGGCCCTTGTTGTTCTTC-3' |
|       | Ddx58.g28.F | 5'- CACCGATATCATTGGATCAACTG-3'   |
|       | Ddx58.g28.R | 5'- AAACCAGTTGATCCAAATGATATC-3', |
|       | Ddx58.g36.F | 5'- CACCGTGGATTGTTGATAAAGGTG-3'  |
|       | Ddx58.g36.R | 5'- AAACCACCTTTATCAACAATCCAC-3'  |
| Ifih1 | Ifih1.g24.F | 5'-CACCGTGTGGGTTTGACATAGCGCG-3'  |
|       | Ifih1.g24.R | 5'-AAACCGCGCTATGTCAAACCCACAC-3'  |

|             |                                 |
|-------------|---------------------------------|
| lfih1.g69.F | 5'-CACCGTTGGCGCAGAACATCCAGGA-3' |
| lfih1.g69.R | 5-AAACTCCTGGATGTTCTGCGCCAAC-3'  |
| lfih1.g81.F | 5'-CACCGCGTAGACGACATATTACCAG-3' |
| lfih1.g81.R | 5-AAACCTGGTAATATGTCGTCTACGC-3'  |

712

713 **Table S2:** KC344519 E1 gene block

714 **CGACCACGATGCCGAGCCAAGCGGGAATCTCGTATAAC**ACCATAGTCAACAGAGCAGGC  
715 TACGCGCCACTCCCTATCAGCATAACACCAACAAAGATCAAGCTGATACCCACAGTGA  
716 TGGAGTACGTACCTGCCATTACAAAACAGGAATGGATTACCAGCCATCAAATGCTGCGG  
717 ATCTCAGGAATGCACTCCAACCTACAGGCCGATGAACAGTGCAAAGTCTTACAGGGGTT  
718 TACCCGTTTCATGTGGGGAGGTGCATATTGCTTTTGCGACACTGAGAACACCCAAGTCAGCA  
719 AGGCCTACGTAATGAAATCTGACGACTGCCTTGC GGATCACGCTGAAGCATACAAAGCGC  
720 ACACAGCCTCAGTGCAGGCATTCTCAACATCACAGTGGGAGAACACTCCATTGTGACCAC  
721 CGTGTACGTGAATGGAGAACTCCTGTGAACTTCAATGGGGTCAAATAACTGCAGGTCCA  
722 CTTTCCACAGCTTGGACACCCTTTGACCGCAAATCGTGCAGTATGCCGGGGAGATCTATA  
723 ATTACGATTTTCTGAGTATGGGGCAGGACAACCAGGAGCATTCCGAGACATAACAATCCAG  
724 AACAGTCTCAAGCTCAGATCTGTATGCCAATACCAACCTAGTGCTGCAGAGACCCAAAGCA  
725 GGAGCGATCCATGTGCCATACTCAGGCACCATCGGGTTTTGAGCAATGGAAGAAAGAT  
726 AAAGCTCCGTCATTGAAATTCACCGCCCCTTTCCGGATGCGAAATATATACAAACCCCATTC  
727 GCGCCGAAAATTGTGCTGTAGGGTCAATTCCATTAGCCTTTGACATCCCTGACGCCCTGTT  
728 CACCAGGGTGTGAGAAACACCGACACTTTCAGCGGCCGAATGTACTCTTAATGAGTGCGT  
729 GTATTCATCCGACTTTGGCGGGATCGCCACGGTCAAGTATTCGGCCAGCAAGTCAGGCAA  
730 GTGCGCAGTCCATGTGCCATCAGGGACTGCTACCCTAAAAGAAGCAGCAGTCGAGCTAAC  
731 CGAGCAAGGGTCCGCGACCATTCAATTTCTCGACCGCAAATATCCACCCGGAGTTCAGGCT  
732 CCAAATATGCACATCATATGTCACGTGCAAAGGTGATTGTCACCCCCGAAAGACCACATT  
733 GTGACACACCCCCAGTATCACGCCCAAACATTACAGCCGCGGTGTCAAAAACCGCGTGG

734 ACGTGGTTAACATCCCTGCTGGGAGGATCG**GCCGTAATTATTATAATTGGCTTGGTGCTG**

735 **GCTACTATTGTGGCCATGTACGTGCTGACC**

736

737

738 **Table S3 DsiRNA sequences**

| <b>Gene</b>    | <b>duplex name</b> | <b>DsiRNA sequence</b>       |
|----------------|--------------------|------------------------------|
| <i>Ehmt2</i>   | mm.Ri.Ehmt2.13.1   | AUCAAUGCAGUAAACCUCGCCAUCCUU  |
|                | mm.Ri.Ehmt2.13.2   | GGUAAGAAUCAUCCUCUCUCACAUCAG  |
|                | mm.Ri.Ehmt2.13.3   | UACCAAACCCAACAUUUAUUGAGAACA  |
| <i>Zc3h4</i>   | mm.Ri.Zc3h4.13.1   | ACAAUUUAUGACUCAAGAAAGUACUA   |
|                | mm.Ri.Zc3h4.13.2   | UAUAAUUUACACGGAAAGUCACCAUGC  |
|                | mm.Ri.Zc3h4.13.3   | UGUCCUUGGACCUGCGGUACUGGUUCA  |
| <i>Thrap3</i>  | mm.Ri.Thrap3.13.1  | UUUAGUAAAGCGUUCAUGCAAUGUCAU  |
|                | mm.Ri.Thrap3.13.2  | GUCGUCAUGCAAGUAAUACUUCUUGCU  |
|                | mm.Ri.Thrap3.13.3  | AAUUCAGAAGUUUCUUAGAAAACCGUC  |
| <i>Syncrip</i> | mm.Ri.Syncrip.13.1 | CUGAAGUAGUAUCCAUGGGCUCUUCAG  |
|                | mm.Ri.Syncrip.13.2 | AGUAGUAAUCAUCAUACAUUUGAUUCU  |
|                | mm.Ri.Syncrip.13.3 | GAAUGAAAGCAUAAUCUUUUAGCUUCU  |
| <i>Bclaf1</i>  | mm.Ri.Bclaf1.13.1  | UGACCUUGGACUAUUAUCAUAAGCUGA  |
|                | mm.Ri.Bclaf1.13.2  | UAUGUAAGCUAUCCAUCAGGUACUAG   |
|                | mm.Ri.Bclaf1.13.3  | ACUCUUUAUCACUAAAGUAAUCUAGAA  |
| <i>Fbl</i>     | mm.Ri.Fbl.13.1     | CAGAUAAAGACACCUUCAUGACGAUGC  |
|                | mm.Ri.Fbl.13.2     | CAGGAUAAUGUUAGUCCUCUUCUUGG   |
|                | mm.Ri.Fbl.13.3     | UCUGCUGACGCAGUGGAGUCA AUGCAG |
| <i>Chtop</i>   | mm.Ri.Chtop.13.1   | ACAUUUCCA AUUUACUACCUUCACUA  |

|               |                   |                              |
|---------------|-------------------|------------------------------|
|               | mm.Ri.Chtop.13.2  | UUUAGUUUUCGACAUGUAUGCAUCCAA  |
|               | mm.Ri.Chtop.13.3  | CUGCUUAAGUUUUAAUGCUGCCUGGAC  |
| <i>Ubap2l</i> | mm.Ri.Ubap2l.13.1 | CCUGUUGUACUGCCACCUUUAGCUUCC  |
|               | mm.Ri.Ubap2l.13.2 | AAGUGGAAGGUGAUUCAGAUUUCACUG  |
|               | mm.Ri.Ubap2l.13.3 | CUGUGAUUAUCAAUCAAUUGUUUCACCU |
| <i>Dhx38</i>  | mm.Ri.Dhx38.13.1  | AUCUUCAUGCAAGUACUGGGUCAGCUG  |
|               | mm.Ri.Dhx38.13.2  | ACAGGUGUACCUGCAAGGACUGCUUCA  |
|               | mm.Ri.Dhx38.13.3  | ACAGAUGAACACGCAGGUGAAAGCCUU  |
| <i>Hnrnpr</i> | mm.Ri.Hnrnpr.13.1 | GUCAUUGUACUCUAUAUAGGUUUAACC  |
|               | mm.Ri.Hnrnpr.13.2 | AACCUAGGUAAGGUUUCUUAUUUUGAU  |
|               | mm.Ri.Hnrnpr.13.3 | AAUUCUUGGUUGUCAUUAUUGUAACCA  |
| <i>Ubtf</i>   | mm.Ri.Ubtf.13.1   | UACCGUACUCGGAAUUUCGAAAAGAGA  |
|               | mm.Ri.Ubtf.13.2   | CUCCAUUCUUAAGGCAUGUAACUGU    |
|               | mm.Ri.Ubtf.13.3   | UUUGUAAGGGUUUUUAACAUGUUCUG   |
| <i>Ddx58</i>  | mm.Ri.Ddx58.13.1  | CACCUACAACUAUUUCCAAAGUUUUC   |
|               | mm.Ri.Ddx58.13.2  | GAUCUCAAUGAACAUUAAGUAGUCA    |
|               | mm.Ri.Ddx58.13.3  | AAGCUCUAAGGUCAGUAUUUUUAACUU  |
| <i>Ifih1</i>  | mm.Ri.Ifih1.13.1  | ACCUACUCCGUAGAAUAGCUAUUCGUC  |
|               | mm.Ri.Ifih1.13.2  | AGGCUCUCUUCUACUACAUAUUUCGAU  |
|               | mm.Ri.Ifih1.13.3  | GUUGUAGUACUCUGCUAUAACUUCGU   |
| <i>Mavs</i>   | mm.Ri.Mavs.13.1   | ACGUAUGUAACUACGAUUUAUAAGAU   |
|               | mm.Ri.Mavs.13.2   | UCUAACCAGGGUCAUUUUUGGUACAGA  |
|               | mm.Ri.Mavs.13.3   | UGGACAAAGUCAUGAUGUGAGUGGUUA  |

739

740
